# Supplementary material
Source: Springer Nature journal article supplement (https://www.springermedizin.de/resource/supplementary/12968_2008_57_MOESM7_ESM.pdf/9577892)

**3D**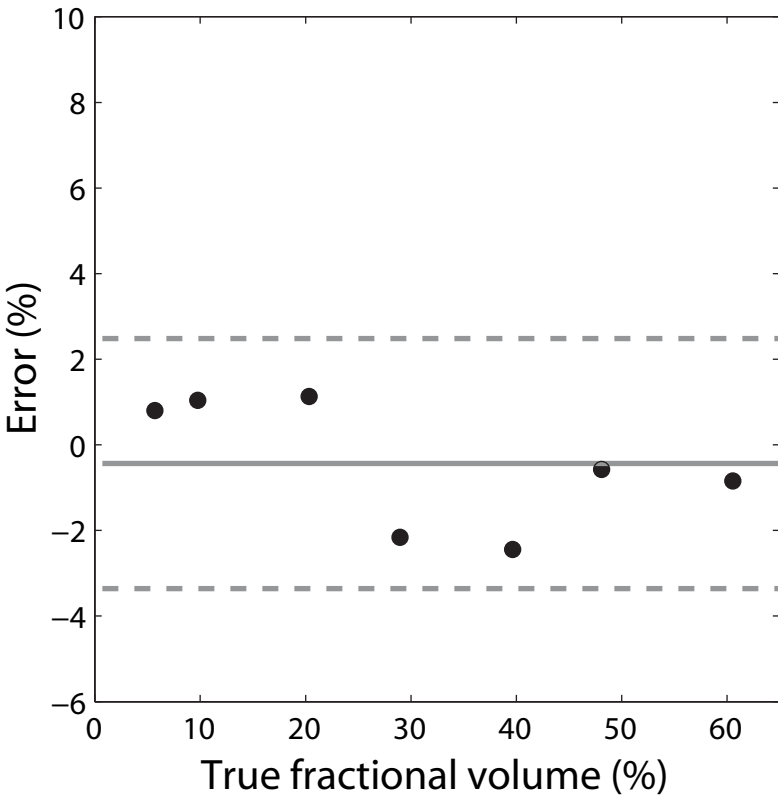**2D 4-slice**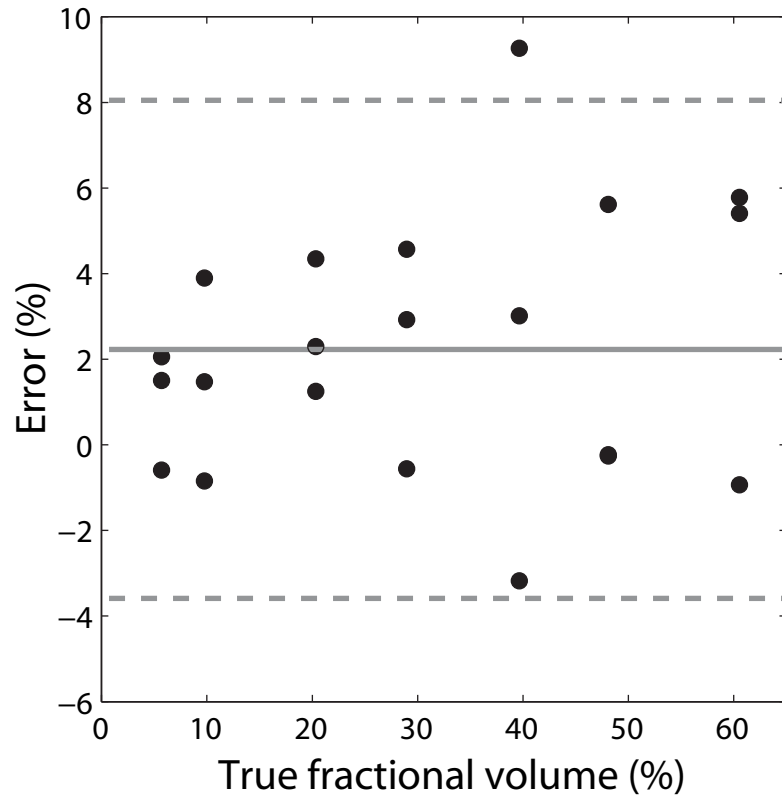**2D 3-slice**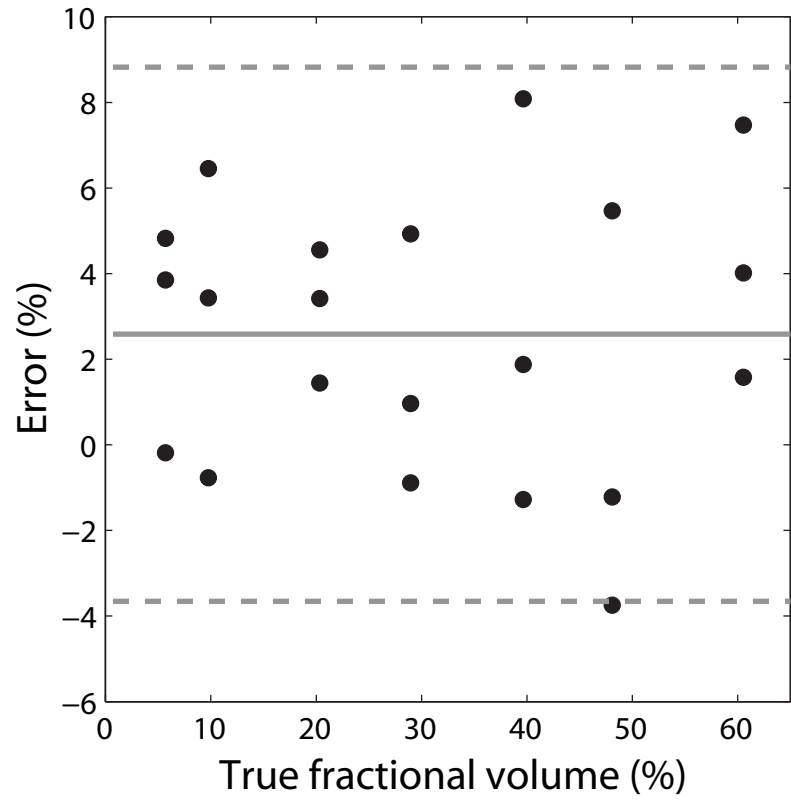

Supplement: MOESM7 [file 9577892]
